# Supplementary material for: HIF-2α-dependent induction of miR-29a restrains TH1 activity during T cell dependent colitis
Source: PubMed Central journal article supplement — Nat Commun. 2024 Sep 14;15:8042. doi: 10.1038/s41467-024-52113-y (PMC11399416; doi:10.1038/s41467-024-52113-y), 2024-09-14
Supplement: 41467_2024_52113_MOESM1_ESM.pdf [file 41467_2024_52113_MOESM1_ESM.pdf]

## Supplementary information

### ***HIF-2 $\alpha$* -Dependent induction of miR-29a Restrains T<sub>H</sub>1 Activity during T cell Dependent Colitis**

Agnieszka K. Czopik, Eóin N. McNamee, Victoria Mota, Xiangsheng Huang, In Hyuk Bang, Trent Clark, Yanyu Wang, Wei Ruan, Tom Ngueyn, Joanne C. Masterson, Eunyoung Tak, Colm B. Collins, Sandra Frank, Howard Li, Cristian Rodriguez-Aguayo, Gabriel Lopez-Berestein, Mark E. Gerich, Glenn T. Furuta, Xiaoyi Yuan, Anil K. Sood, Edwin F. de Zoeten, and Holger K. Eltzschig

## Supplementary Figure 1, related to Figure 1

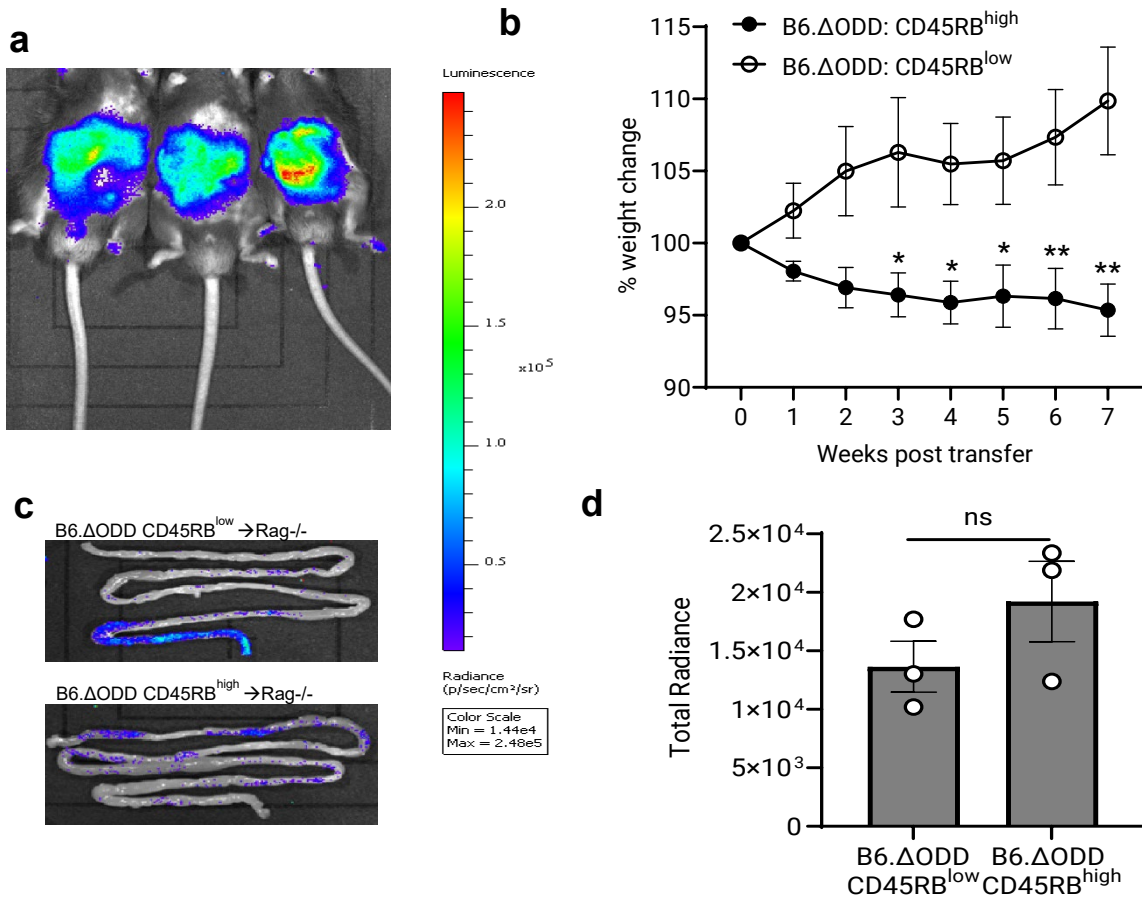

### T-cell intrinsic hypoxia in models of colitis.

Chronic T cell-mediated colitis was induced in B6.RAG1<sup>-/-</sup> mice by intraperitoneal injection (0.5 × 10<sup>6</sup>) of naïve CD4<sup>+</sup> CD45RB<sup>high</sup> or CD45RB<sup>low</sup> T cells derived from B6.ΔODD.luc mice. **a.** Representative IVIS imaging of hypoxic colons in live animals under anesthesia at fulminant disease. **b.** Weight change in adoptively transferred mice, n=5/group, 2-way ANOVA. **c.** Representative images of small intestines from B6.ΔODD.luc T cells-transferred mice were obtained using IVIS. **d.** Total radiance measurements in small intestines in T cells transfer mice are not significantly different between groups, n=3/group. Data expressed as Mean ± S.E.M.

\*p<0.05, \*\*p<0.05 vs. indicated.

**Supplementary Figure 2, related to Figure 4**

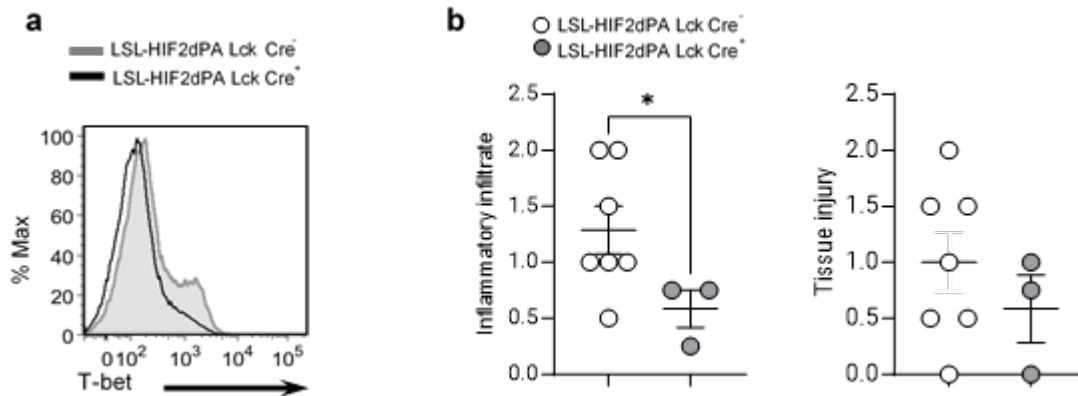

**Tbet expression in CD4<sup>+</sup> T<sub>H</sub>1 T cells is specifically repressed by HIF-2 $\alpha$ .** T<sub>H</sub>1 colitis was induced in LSL-HIF2dPA Lck Cre<sup>+</sup> mice and controls by epicutaneous skin sensitization followed by rectal gavage with TNBS as per Materials & Methods. Tbet protein expression in gated CD4<sup>+</sup> T-cells from lamina propria was measured by flow cytometry. **a.** Representative histogram from LSL-HIF2dPA Lck Cre<sup>+</sup> or Cre<sup>-</sup> littermate controls. **b.** Inflammatory and tissue injury scores from LSL-HIF2dPA Lck Cre<sup>+</sup> or Cre<sup>-</sup> littermate controls following TNBS trial; quantitated from histological slides. Data expressed as Mean from 2 pooled independent experiments (n=3-7/group, one-tailed T test)., \*p<0.05, vs. indicated.

**Supplementary Figure 3, related to Figure 5**

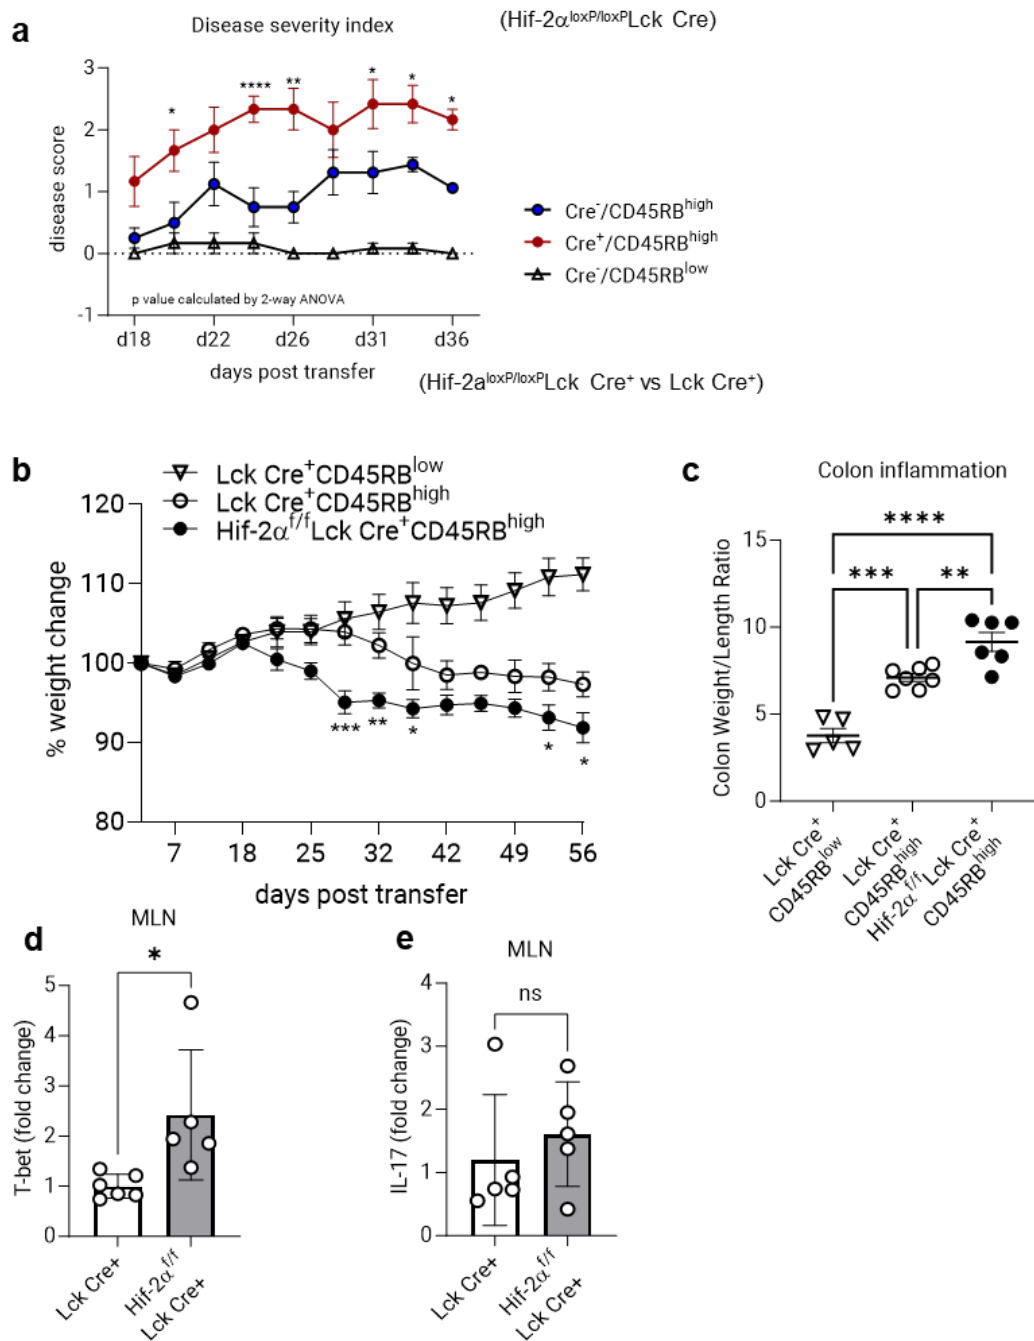

### T cell-intrinsic HIF-2 $\alpha$ regulates T-cell function in Colitis.

Chronic T cell-mediated colitis was induced in B6.RAG1<sup>-/-</sup> mice by intraperitoneal injection (0.5x10<sup>6</sup>) of naïve CD4<sup>+</sup> CD45RB<sup>high</sup> or CD45RB<sup>low</sup> T cells derived from Hif-2 $\alpha^{loxP/loxP}$  Lck Cre<sup>+</sup> or Cre<sup>-</sup> animals. **a.** Disease severity index as measured by the stool consistency and

presence/absence of rectal prolapse was assayed every two days from day 18 until day 36 post-injection in each group of transfer recipients, (n=6-7 mice/group, two-way ANOVA).

Rag1<sup>-/-</sup> mice were adoptively transferred with  $0.5 \times 10^6$  FACS-sorted CD4<sup>+</sup>CD45RB<sup>high</sup> or CD4<sup>+</sup>CD45RB<sup>low</sup> T cells. **b.** Weight change in mice receiving donor cells from Lck Cre<sup>+</sup> or *Hif-2* $\alpha^{loxP/loxP}$  Lck Cre<sup>+</sup> mice (5-8 mice/group, two-way ANOVA). **c.** Colon inflammation in transfer recipient mice at conclusion of trial (n=5-8 mice/group, one-way-ANOVA). **d.** Tbet expression in T cells of MLN of the transfer recipient mice (n=5-6 mice/group, two-tailed T test). **e.** IL-17A expression in T cells of MLN in transfer recipient mice (n=5 mice/group, two-tailed T test). Data expressed as Mean  $\pm$  S.E.M, *Hif2* $\alpha^{loxP/loxP}$  abbreviated as *Hif2* $\alpha^{f/f}$  for clarity in some graphs, \*p<0.05, \*\*p<0.01, \*\*\*p<0.001.

**Supplementary Figure 4, related to Figure 6**

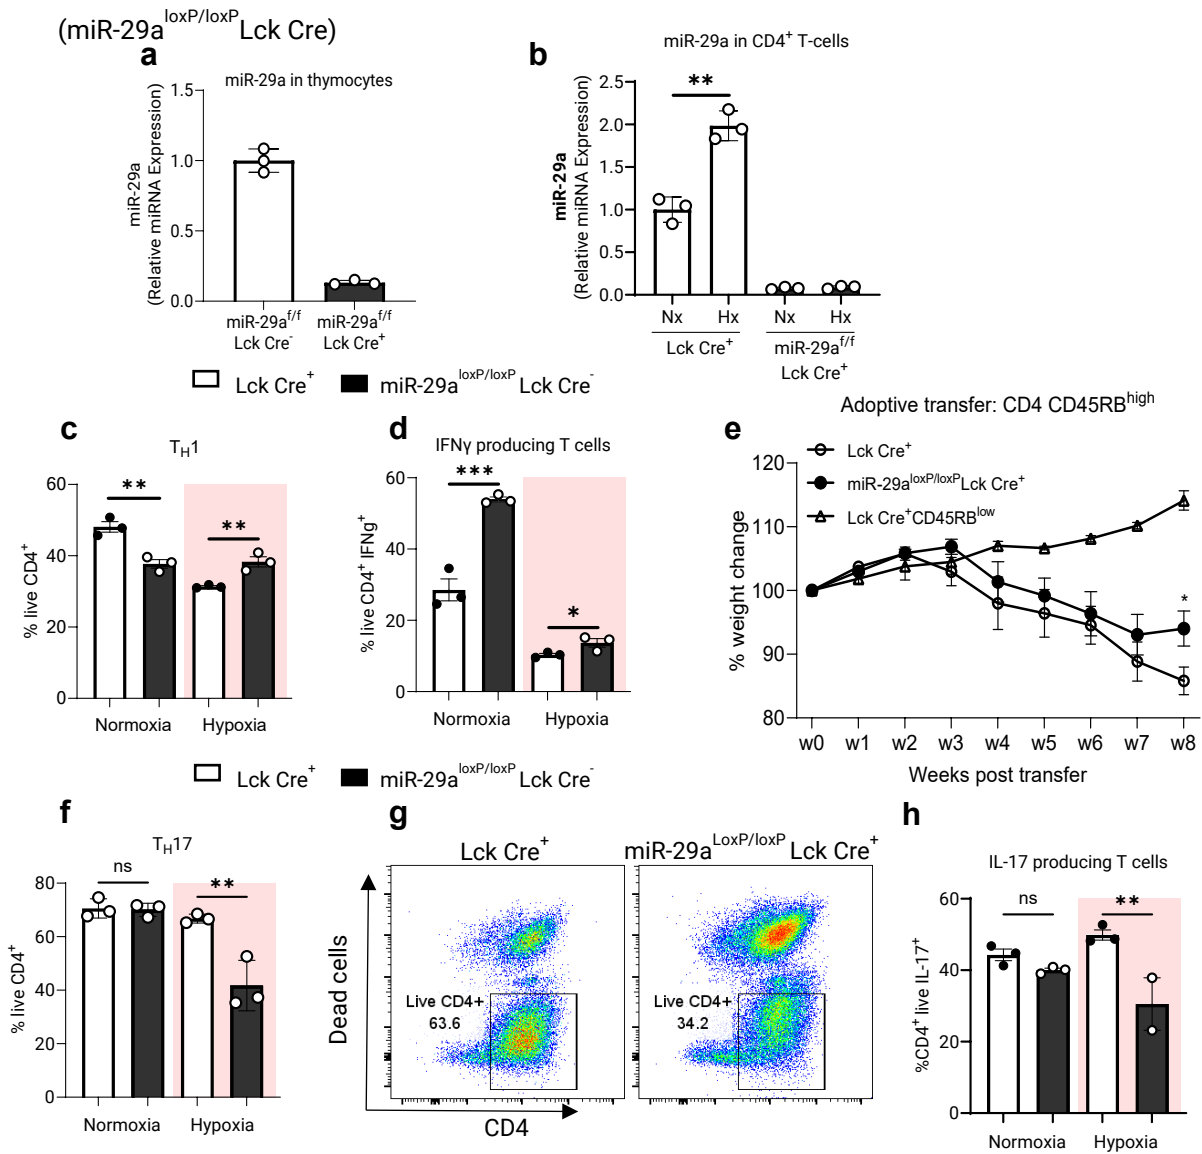

### T cell-intrinsic miR-29a regulates T-cell function in vitro and in vivo.

Thymocytes or naïve CD4<sup>+</sup> T cells were isolated from *miR-29a<sup>loxP/loxP</sup>* Lck Cre<sup>+</sup> or Cre<sup>-</sup> littermates.

#### a. Expression of miR-29a in thymocytes (n=3).

Purified naïve CD4<sup>+</sup> T cells from *miR-29a<sup>loxP/loxP</sup>* Lck Cre<sup>+</sup> or Lck Cre<sup>+</sup> were cultured for 3 days

under T<sub>H</sub>0 or T<sub>H</sub>1 skewing conditions in the presence of IL-2 and anti-CD3/CD28 under normoxia

or hypoxia. **b.** Expression of miR-29a in T<sub>H</sub>1-skewed T cells activated in vitro, (n=3, two-tailed T test).

Day 3 T<sub>H</sub>1 skewed cells were re-stimulated with anti CD3/CD28 and grown under normoxia or hypoxia for 48h. **c.** Percentage of live CD4<sup>+</sup> T cells was determined using flow cytometry in each condition. **d.** Intracellular staining was used to determine levels of IFN $\gamma$  in live CD4<sup>+</sup> T cells, (c, d: n=3, repeated 2 times, one-tailed T test).

**e.** 8-week-old Rag1<sup>-/-</sup> mice were adoptively transferred with naïve CD4<sup>+</sup> CD45RB<sup>high</sup> T cells at 0.5\*10<sup>6</sup> per mouse and weight change was recorded for the duration of the study (n=3-6 mice/group).

Purified naïve CD4<sup>+</sup> T cells from *miR-29a*<sup>loxP/loxP</sup> Lck Cre<sup>+</sup> or Lck Cre<sup>+</sup> were cultured for 3 days under T<sub>H</sub>17 skewing conditions in the presence of IL-2 and anti-CD3/CD28 under normoxia or hypoxia. **f.** Percentage of live CD4<sup>+</sup> T cells was determined using flow cytometry in each condition. **g.** Representative flow cytometry plots showing decreased survival of miR-29a deficient T<sub>H</sub>17-skewed T cells under hypoxia. **h.** Intracellular staining was used to determine levels of IL-17A in live CD4<sup>+</sup> T cells (n=2-3, repeated 2 times, one-way ANOVA). Data expressed as Mean $\pm$  S.E.M, *miR-29a*<sup>loxP/loxP</sup> abbreviated as *miR-29a*<sup>f/f</sup> for clarity in some graphs, \*p<0.05, \*\*p<0.01, \*\*\*p<0.001, for all repeated trials see Source Data file.

Supplementary Figure 5, related to Figure 6

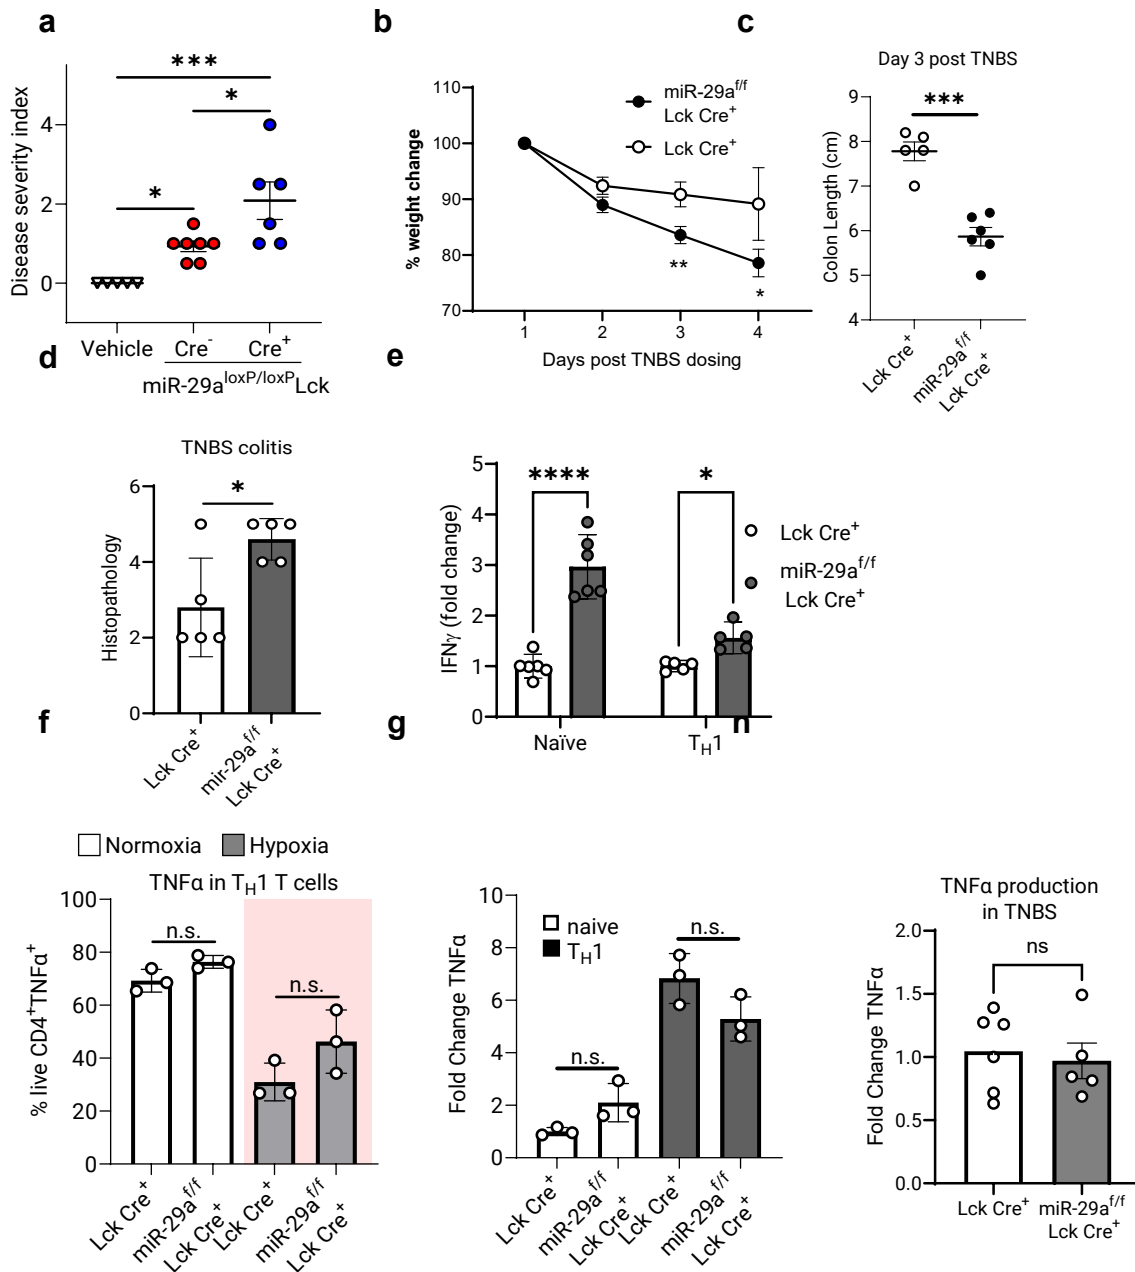

**T cell-intrinsic miR-29a regulates T-cell function during inflammation.** T<sub>H</sub>1 colitis was induced in *miR-29a*<sup>loxP/loxP</sup> Lck Cre<sup>+</sup> or Cre<sup>-</sup> littermate control mice by the epicutaneous skin sensitization and subsequent rectal gavage with TNBS. **a**. Disease scores were determined based on stool

consistency and bleeding, as per Materials and Methods (n=5-7, pooled data from 2 experiments, one-way ANOVA).

TNBS colitis was induced in *miR-29a<sup>loxP/loxP</sup>* Lck Cre<sup>+</sup> or Lck Cre<sup>+</sup> control mice (non-littermate).

**b.** Weight change in the course of TNBS colitis (n=8-9, pooled data from 2 experiments, one-way ANOVA). **c.** Colon length was measured at fulminant disease (n=5-6, pooled data, two-tailed T test). **d.** Histology scores were determined by scientists blinded to the genotype of mice (n=5, pooled data, two-tailed T test).

Naïve and T<sub>H</sub>1-skewed CD4<sup>+</sup> T cells were prepared from *miR-29a<sup>loxP/loxP</sup>* Lck Cre<sup>+</sup> or Lck Cre<sup>+</sup> mice.

**e.** Production of IFN $\gamma$  upon 18h re-stimulation was measured in both types of T cells.

CD4<sup>+</sup> T cells sufficient and deficient in miR-29a were purified from spleen suspensions and cultured under T<sub>H</sub>1 conditions for 3 days then re-stimulated with anti CD3/CD28 for 48h under normoxia or hypoxia (n=3, one-way ANOVA). **f.** Numbers of live CD4<sup>+</sup> T cells producing TNF $\alpha$  were determined using flow cytometry and intracellular staining (n=3, one way ANOVA). **g.** Q-PCR normalized to 18s was used to measure TNF $\alpha$  production in naïve and T<sub>H</sub>1 (day 3) skewed CD4<sup>+</sup> T cells re-stimulated for 18h with anti-CD3/CD28 antibodies (n=3, one-way ANOVA). **h.** Colon biopsies from TNBS-treated mice were used to extract total RNA and measure TNF $\alpha$  production (n=3, two-tailed T test). Data expressed as Mean $\pm$  S.E.M, *miR-29a<sup>loxP/loxP</sup>* abbreviated as *miR-29a<sup>f/f</sup>* for clarity in some graphs, \*p<0.05, \*\*p<0.01, \*\*\*p<0.001.

**Supplementary Figure 6, related to Figure 7**

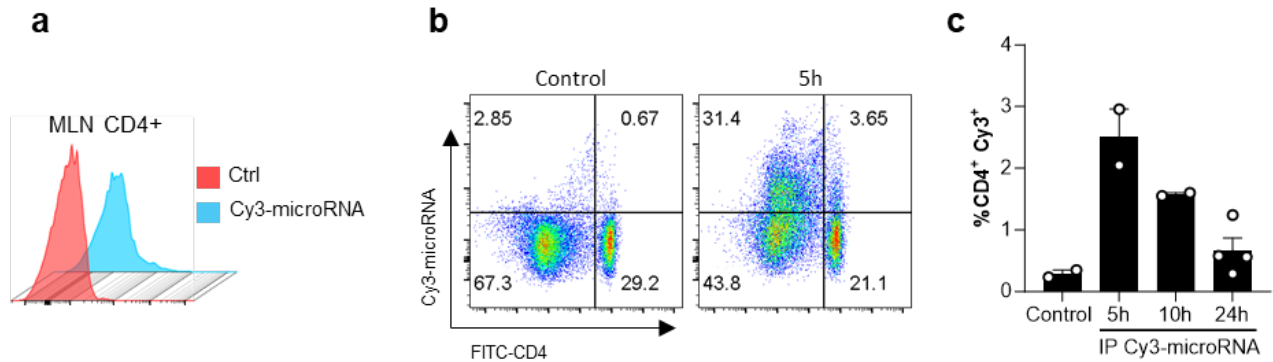

**Nanoparticle-mediated delivery of microRNA mimetic to colitic T cells.** C57BL/6J mice that were previously challenged with TNBS (disease day 2 or 3) were subsequently intraperitoneally injected with Cy3-labeled and DOPC-packaged control microRNA. Mesenteric lymph nodes were isolated at 5h, 10h and 24h post mimic-injection from the mesenteric lymph nodes and assayed by flow cytometry. **a.** Representative histogram of Cy3-positive CD4<sup>+</sup> T cells. **b.** Representative FACS plots of Cy3 positive fraction of CD4<sup>+</sup> T cells. **c.** Percentages of Cy3<sup>+</sup> CD4<sup>+</sup> T cells as a function of time post injection of liposome-packaged mimetics. Data expressed as Mean ± S.E.M, n=2-4 mice/group/time point in **c**.

## Supplementary Figure 7, flow cytometry gating strategy

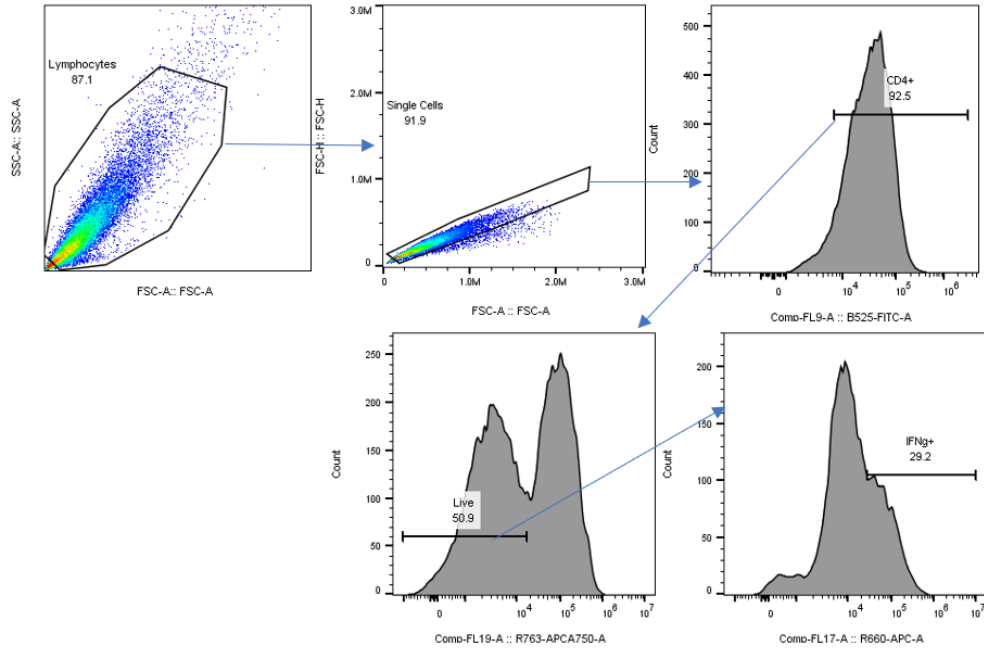

Example of Flow Cytometry gating strategy used for T cells

**Supplementary Table 1.****Patient Characteristics, related to Figure 2**

| Phenotype        | n  | Age<br>(yrs.; mean) | Disease duration<br>(yrs.; mean) | Current IBD Medications |         |          |
|------------------|----|---------------------|----------------------------------|-------------------------|---------|----------|
|                  |    |                     |                                  | Prednisone              | AZA/6MP | Anti-TNF |
| Healthy Controls | 10 | 51.4                | n/a                              | 0%                      | 0%      | 0%       |
| Inactive UC      | 6  | 47.8                | 16.8                             | 33%                     | 50%     | 0%       |
| Active UC        | 6  | 51.5                | 8.8                              | 50%                     | 33%     | 0%       |
| Inactive Crohn's | 4  | 47.5                | 22.0                             | 0%                      | 17%     | 33%      |
| Active Crohn's   | 6  | 36.7                | 5.0                              | 33%                     | 0%      | 0%       |
