# Supplementary material for: HIF-2α-dependent induction of miR-29a restrains TH1 activity during T cell dependent colitis
Source: PubMed Central journal article supplement — Nat Commun. 2024 Sep 14;15:8042. doi: 10.1038/s41467-024-52113-y (PMC11399416; doi:10.1038/s41467-024-52113-y), 2024-09-14
Supplement: 41467_2024_52113_MOESM3_ESM.pdf [file 41467_2024_52113_MOESM3_ESM.pdf]

## Description of Additional Supplementary Files

File Name: Supplementary Data 1

Description: **T cell microRNA array**. Data set that includes the limited T-cell focused microRNA PCR based microarray from Qiagen (first generation)
